# Supplementary material for: Association of Rare Coding Mutations With Alzheimer Disease and Other Dementias Among Adults of European Ancestry
Source: PubMed Central journal article supplement (PMC6450321; doi:10.1001/jamanetworkopen.2019.1350), 2019-03-29

## Supplementary Online Content

Patel D, Mez J, Vardarajan BN, et al; Alzheimer Disease Sequencing Project. Association of rare coding mutations with Alzheimer disease and other dementias among adults of European ancestry. *JAMA Netw Open*. 2019;2(3):e191350. doi:10.1001/jamanetworkopen.2019.1350

**eMethods.** Detailed Methodology

### eReferences

**eTable 1.** Characteristics of Subjects in the ADSP WES Case-Control Dataset

**eTable 2.** Previously Established Genes for AD, AD-Related Traits and Other Dementias

**eTable 3.** Filtering Pipeline of Rare Variants

**eTable 4.** High and Moderate Impact Rare Variants in Previously Established AD Genes Occurring In  $\geq 4$  Participants With AD and No Controls

**eTable 5.** Characteristics of AD Subjects in the ADSP WES Dataset With the *NOTCH3* rs149307620 Mutation

**eTable 6.** Characteristics of Subjects in the WGS Replication Datasets

**eTable 7.** Characteristics of AD Subjects With the *TREM2* rs104894002 Mutation (Q33X)

**eTable 8.** High and Moderate Impact Rare Variants Genome-Wide Occurring in  $> 10$  Participants With AD and No Controls

**eTable 9.** Genes With  $\geq 3$  Distinct High/Moderate Disease Impact Rare Variants Each With a MAC  $\geq 5$  and Occurring Only in Cases

**eTable 10.** High Impact Rare Variants Genome-Wide With a MAC  $\geq 7$  and Occurring Only in AD Cases

**eFigure 1.** Study Design

**eFigure 2.** Haplotype Analysis of the Rare *NOTCH3* rs149307620 Variant

**eFigure 3.** Population Substructure of the ADSP Discovery Sample

**eFigure 4.** Utah Pedigree Segregating rs141402160 and rs140914494 Mutations

**eFigure 5.** Utah Pedigree Segregating rs112197217 Mutation

**eFigure 6.** Protein-Protein Interaction Network Including *NOTCH3* and *JAG1*

**eFigure 7.** Haplotype Analysis of *ABCD4* and *CELSR1/GTSE1*

This supplementary material has been provided by the authors to give readers additional information about their work.

## eMethods. Detailed Methodology

### Data Processing

DNA sequencing was performed at the Broad Institute, the Baylor College of Medicine's Human Genome Sequencing Center, and Washington University's McDonnell Genome Institute. Genotypes for bi-allelic single nucleotide variants (SNVs) and short insertion-deletion polymorphisms (indels) were called using ATLAS2.<sup>1</sup> Only variants that overlapped the target regions captured by kits used by the three sequencing centers (Illumina and Nimblegen) were included. Variants that showed extreme departure from Hardy-Weinberg equilibrium (HWE,  $P < 10^{-6}$ ) among unrelated controls, were monomorphic, or had call rates  $< 80\%$  or average read depth  $< 10$  were excluded. In addition, samples that were outliers according to population substructure analysis or had a genetically determined sex that was inconsistent with the reported sex were excluded.<sup>2</sup> Cryptic relatedness was estimated using pairwise identity-by-descent (IBD) in PLINK<sup>3</sup> and one member from each of 69 pairs of individuals with  $\hat{\pi}$  (proportion of alleles shared IBD)  $> 0.4$  was excluded.<sup>2</sup> After quality control (QC), there remained for analysis a total of 10,211 EA (5,617 AD cases, 4,594 controls) and 400 CH (221 cases, 179 controls) subjects.

### Variant Selection and Annotation

Minor allele counts (MAC) genome-wide and in a group of 95 genes previously associated with AD, AD-related traits, or dementia by genetic association or experimental approaches (eTable 2 in the Supplement) were tabulated for rare variants occurring only in AD cases. Variants were annotated with the Variant Effect Predictor tool (VEP)<sup>4</sup> and Combined Annotation Dependent Depletion (CADD) scores<sup>5</sup> as having high functional impact (includes splice acceptor, splice donor, stop gained, frameshift, stop lost, start lost, or transcript amplification variants) or moderate functional impact (includes in-frame insertion, in-frame deletion, missense, or protein altering variants). A scaled CADD score of 20, for example, means that a variant is among the top 1% of deleterious variants in the human genome, and a scaled CADD score of 30 means that the variant is in the top 0.1%. Synonymous mutations and variants with a MAC  $< 3$  were excluded. The filtering of variants at each step in the pipeline is shown in eTable 3 in the Supplement.

### Variant Filtering Pipeline in Utah Pedigrees

We retained 564 rare variants that were shared between at least one cousin pair. We then retained all markers with a minor allele frequency (MAF) less than 0.1% in one of the following public whole exome and whole genome sequencing databases: 1000 Genomes,<sup>6</sup> Exome Aggregation Consortium (ExAC),<sup>7</sup> the Genome Aggregation Database (gnomAD),<sup>7</sup> and NHLBI GO Exome Sequencing Project (ESP),<sup>8</sup> resulting in the retention of 400 candidate variants. Variants that did not meet criteria for pathogenicity based on (1) American College of Medical Genetics and Genomics criteria<sup>9</sup> for "pathogenic" or "likely pathogenic", (2) association with loss or gain of gene function, and (3) prediction of haploinsufficiency were excluded. The genes containing the remaining 389 variants were screened for relevance to AD or  $\beta$ -amyloid pathology, after which 118 variants remained. Twelve variants were added to the group of 118 variants for further evaluation that were (1) reported in the literature as an AD risk variant (two variants), (2) had a p value  $< 0.09$  for association of increased risk of AD in the ADGC GWAS (two variants),<sup>10</sup> (3) absent in whole genome sequences of 1,354 participants of the Welllderly cohort who are  $> 80$  years old with no chronic diseases and who are not taking chronic medications,<sup>11</sup> suggesting that the variant is not observed in the healthy elderly population (three variants), or (4) observed in multiple cousin pairs (five variants).

### Protein Homology Modeling

Since the *NOTCH3* structure could not be found in any protein databases, homologous proteins were considered for modeling the region containing the *NOTCH3* mutations. Considering the AD-associated mutation on exon 6 (rs149307620), the closest matching sequence was identified in *NOTCH1* that had 76% homology of amino acid sequence identity suggesting that these proteins may have similar functions and it is a high

quality model. SWISS-MODEL was used to create a model for the *NOTCH3* region using homologous Protein Data Bank (PDB) structure 5UK5 in *NOTCH1*.<sup>12</sup> The same procedure was applied for other mutations in *NOTCH3* that are associated with Cerebral Autosomal Dominant Arteriopathy with Subcortical Infarcts and Leukoencephalopathy (CADASIL).

## eReferences

1. Challis D, Yu J, Evani US, et al. An integrative variant analysis suite for whole exome next-generation sequencing data. *BMC Bioinformatics* 2012; 13:8.
2. Bis J, Jian X, Kunkle B, et al. Whole exome sequencing study identifies novel rare and common Alzheimer's-associated variants involved in immune response and transcriptional regulation. *Mol Psychiatry* 2018. doi:10.1038/s41380-018-0112-7.
3. Purcell S, Neale B, Todd-Brown K, et al. PLINK: a tool set for whole-genome association and population-based linkage analyses. *Am J Hum Genet* 2007; 81:559-575.
4. McLaren W, Gil L, Hunt SE, et al. The Ensembl Variant Effect Predictor. *Genome Biol* 2016; 17:122.
5. Kircher M, Witten DM, Jain P, O'Roak BJ, Cooper GM, Shendure J. A general framework for estimating the relative pathogenicity of human genetic variants. *Nat Genet* 2014; 46:310-315.
6. Auton A, Brooks LD, Durbin RM, et al. A global reference for human genetic variation. *Nature* 2015; 526:68-74.
7. Lek M, Karczewski KJ, Minikel EV, et al. Analysis of protein-coding genetic variation in 60,706 humans. *Nature* 2016; 536:285-291.
8. NHLBI GO Exome Sequencing Project (ESP) Exome Variant Server. <http://evs.gs.washington.edu/EVS/>
9. Richards S, Aziz N, Bale S, et al. Standards and guidelines for the interpretation of sequence variants: a joint consensus recommendation of the American College of Medical Genetics and Genomics and the Association for Molecular Pathology. *Genet Med* 2015; 17:405-424.
10. Naj AC, Jun G, Beecham GW, et al. Common variants at MS4A4/MS4A6E, CD2AP, CD33 and EPHA1 are associated with late-onset Alzheimer's disease. *Nat Genet* 2011; 43:436-441.
11. Erikson GA, Bodian DL, Rueda M, et al. Whole-genome sequencing of a healthy aging cohort. *Cell* 2016; 165:1002-1011.
12. Luca VC, Kim BC, Ge C, et al. Notch-Jagged complex structure implicates a catch bond in tuning ligand sensitivity. *Science* 2017; 355:1320-1324.
13. Reitz C, Jun G, Naj A, et al. Variants in the ATP-binding cassette transporter (ABCA7), apolipoprotein E  $\epsilon$ 4, and the risk of late-onset Alzheimer disease in African Americans. *JAMA* 2013; 309:1483-1492.
14. Hollingworth P, Harold D, Sims R, et al. Common variants at ABCA7, MS4A6A/MS4A4E, EPHA1, CD33 and CD2AP are associated with Alzheimer's disease. *Nat Genet* 2011; 43:429-435.
15. Beecham GW, Hamilton K, Naj AC, et al. Genome-wide association meta-analysis of neuropathologic features of Alzheimer's disease and related dementias. *PLoS Genet* 2014; 10:e1004606.
16. Sims R, van der Lee SJ, Naj AC, et al. Rare coding variants in PLCG2, ABI3, and TREM2 implicate microglial-mediated innate immunity in Alzheimer's disease. *Nat Genet* 2017; 49:1373-1384.
17. Meng Y, Baldwin CT, Bowirrat A, et al. Association of polymorphisms in the angiotensin-converting enzyme gene with Alzheimer disease in an Israeli Arab community. *Am J Hum Genet* 2006; 78:871-877.
18. Sogorb-Esteve A, García-Ayllón M, Gobom J, et al. Levels of ADAM10 are reduced in Alzheimer's disease CSF. *J Neuroinflammation* 2018; 15:213.
19. Yuan X, Sun S, Tan C, Yu J, Tan L. The role of ADAM10 in Alzheimer's disease. *J Alzheimers Dis* 2017; 58:303-322.
20. Gurses MS, Ural MN, Gulec MA, Akyol O, Akyol S. Pathophysiological function of ADAMTS enzymes on molecular mechanism of Alzheimer's disease. *Aging Dis* 2016; 7:479-490.
21. Chung J, Zhang X, Allen M, et al. Genome-wide pleiotropy analysis of neuropathological traits related to Alzheimer disease. *Alzheimers Res Ther* 2018; 10:22.
22. Logue MW, Schu M, Vardarajan BN, et al. Two rare AKAP9 variants are associated with Alzheimer disease in African Americans. *Alzheimers Dement* 2014; 10:618.e11.
23. Farrer LA, Cupples LA, Haines JL, et al. Effects of age, sex, and ethnicity on the association between apolipoprotein E genotype and Alzheimer disease. A meta-analysis. APOE and Alzheimer Disease Meta Analysis Consortium. *JAMA* 1997; 278:1349-1356.
24. Corder EH, Saunders AM, Strittmatter WJ, et al. Gene dose of apolipoprotein E type 4 allele and the risk of Alzheimer's disease in late onset families. *Science* 1993; 261:921-923.
25. Goate A, Chartier-Harlin MC, Mullan M, et al. Segregation of a missense mutation in the amyloid precursor protein gene with familial Alzheimer's disease. *Nature* 1991; 349:704-706.
26. Seshadri S, Fitzpatrick AL, Ikram MA, et al. Genome-wide analysis of genetic loci associated with Alzheimer disease. *JAMA* 2010; 303:1832-1840.
27. Jun GR, Chung J, Mez J, Barber R, et al. Transethnic genome-wide scan identifies novel Alzheimer's disease loci. *Alzheimers Dement* 2017; 13 727-738.
28. Rosenthal SL, Barmada MM, Wang X, Demirci FY, Kamboh MI. Connecting the dots: potential of data integration to identify regulatory SNPs in late-onset Alzheimer's disease GWAS findings. *PLoS ONE* 2014; 9:e95152.

29. Rehker J, Rodhe J, Nesbitt RR, *et al.* Caspase-8, association with Alzheimer's Disease and functional analysis of rare variants. *PLoS ONE* 2017; 12:e0185777.
30. Lambert JC, Ibrahim-Verbaas CA, Harold D, *et al.* Meta-analysis of 74,046 individuals identifies 11 new susceptibility loci for Alzheimer's disease. *Nat Genet* 2013; 45:1452-1458.
31. Bannwarth S, Ait-El-Mkadem S, Chausseot A, *et al.* A mitochondrial origin for frontotemporal dementia and amyotrophic lateral sclerosis through CHCHD10 involvement. *Brain* 2014; 137(Pt 8):2329-2345.
32. Skibinski G, Parkinson NJ, Brown JM, *et al.* Mutations in the endosomal ESCRTIII-complex subunit CHMP2B in frontotemporal dementia. *Nat Genet* 2005; 37:806-808.
33. Mez J, Chung J, Jun G, *et al.* Two novel loci, *COBL* and *SLC10A2*, for Alzheimer's disease in African Americans. *Alzheimers Dement* 2017; 13 119-129.
34. Rademakers R, Baker M, Nicholson AM, *et al.* Mutations in the colony stimulating factor 1 receptor (CSF1R) gene cause hereditary diffuse leukoencephalopathy with spheroids. *Nat Genet* 2011; 44:200-205.
35. van der Knaap, Marjo S., Leegwater PAJ, *et al.* Mutations in each of the five subunits of translation initiation factor eIF2B can cause leukoencephalopathy with vanishing white matter. *Ann Neurol* 2002; 51:264-270.
36. Matsukawa T, Wang X, Liu R, Wortham NC, Onuki Y, Kubota A, *et al.* Adult-onset leukoencephalopathies with vanishing white matter with novel missense mutations in EIF2B2, EIF2B3, and EIF2B5. *Neurogenetics*. 2011; 12(3):259-261.
37. Tosto G, Fu H, Vardarajan BN, *et al.* F-box/LRR-repeat protein 7 is genetically associated with Alzheimer's disease. *Ann Clin Transl Neurol* 2015; 2:810-820.
38. Lambert J-, Grenier-Boley B, Harold D, *et al.* Genome-wide haplotype association study identifies the FRMD4A gene as a risk locus for Alzheimer's disease. *Mol Psychiatry* 2013; 18:461-470.
39. Yan J, Deng H, Siddique N, *et al.* Frameshift and novel mutations in FUS in familial amyotrophic lateral sclerosis and ALS/dementia. *Neurology* 2010; 75:807-814.
40. Cruchaga C, Kauwe JSK, Harari O, *et al.* GWAS of cerebrospinal fluid tau levels identifies risk variants for Alzheimer's disease. *Neuron* 2013; 78:256-268.
41. Rademakers R, Eriksen JL, Baker M, *et al.* Common variation in the miR-659 binding-site of GRN is a major risk factor for TDP43-positive frontotemporal dementia. *Hum Mol Genet* 2008; 17:3631-3642.
42. Lee JH, Kahn A, Cheng R, *et al.* Disease-related mutations among Caribbean Hispanics with familial dementia. *Mol Genet Genomic Med* 2014; 2:430-437.
43. Wang Z, Wan Y, Tan L, *et al.* Genetic Association of HLA Gene Variants with MRI Brain Structure in Alzheimer's Disease. *Mol Neurobiol* 2017; 54:3195-3204.
44. Escott-Price V, Bellenguez C, Wang L, *et al.* Gene-wide analysis detects two new susceptibility genes for Alzheimer's disease. *PLoS ONE* 2014; 9:e94661.
45. Vidal R, Frangione B, Rostagno A, *et al.* A stop-codon mutation in the BRI gene associated with familial British dementia. *Nature* 1999; 399:776-781.
46. Ghiso JA, Holton J, Miravalle L, *et al.* Systemic amyloid deposits in familial British dementia. *J Biol Chem* 2001; 276:43909-43914.
47. Vidal R, Revesz T, Rostagno A, *et al.* A decamer duplication in the 3' region of the BRI gene originates an amyloid peptide that is associated with dementia in a Danish kindred. *Proc Natl Acad Sci USA* 2000; 97:4920-4925.
48. Jun G, Ibrahim-Verbaas CA, Vronskaya M, *et al.* A novel Alzheimer disease locus located near the gene encoding tau protein. *Mol Psychiatry* 2016; 21:108-117.
49. Schuster J, Sundblom J, Thureson A, *et al.* Genomic duplications mediate overexpression of lamin B1 in adult-onset autosomal dominant leukodystrophy (ADLD) with autonomic symptoms. *Neurogenetics* 2011; 12:65-72.
50. Beecham G, Hamilton K, Naj A, *et al.* Genome-wide association meta-analysis of neuropathologic features of Alzheimer's disease and related dementias. *PLoS Genet* 2014; 10:e10
51. Chung J, Wang X, Maruyama T, *et al.* Genome-wide association study of Alzheimer's disease endophenotypes at prediagnosis stages. *Alzheimers Dement* 2018; 14:623-633.
52. McKenzie AT, Moyon S, Wang M, *et al.* Multiscale network modeling of oligodendrocytes reveals molecular components of myelin dysregulation in Alzheimer's disease. *Mol Neurodegener* 2017; 12:82.
53. Joutel A, Corpechot C, Ducros A, *et al.* Notch3 mutations in CADASIL, a hereditary adult-onset condition causing stroke and dementia. *Nature* 1996; 383:707-710.
54. Joutel A, Vahedi K, Corpechot C, *et al.* Strong clustering and stereotyped nature of Notch3 mutations in CADASIL patients. *Lancet* 1997; 350:1511-1515.
55. Patel T, Brookes KJ, Turton J, *et al.* Whole-exome sequencing of the BDR cohort: evidence to support the role of the PILRA gene in Alzheimer's disease. *Neuropathol Appl Neurobiol* 2017. doi:10.1111/nan.12452.
56. Logue MW, Schu M, Vardarajan BN, *et al.* Search for age-related macular degeneration risk variants in Alzheimer disease genes and pathways. *Neurobiol Aging* 2014; 35(6):18.

57. Cruchaga C, Karch CM, Jin SC, *et al.* Rare coding variants in the phospholipase D3 gene confer risk for Alzheimer's disease. *Nature* 2014; 505:550-554.
58. Jun G, Asai H, Zeldich E, *et al.* PLXNA4 is associated with Alzheimer disease and modulates tau phosphorylation. *Ann Neurol* 2014; 76:379-392.
59. Jun GR, Chung J, Lunetta KL, *et al.* Further stratification of APOE E4-negative subjects identifies novel genes for Alzheimer's disease. *Alzheimers Dement* 2016; 12(7).
60. Mead S, Mahal SP, Beck J, *et al.* Sporadic--but not variant--Creutzfeldt-Jakob disease is associated with polymorphisms upstream of PRNP exon 1. *Am J Hum Genet* 2001; 69:1225-1235.
61. Sherrington R, Rogaeve EI, Liang Y, *et al.* Cloning of a gene bearing missense mutations in early-onset familial Alzheimer's disease. *Nature* 1995; 375:754-760.
62. Levy-Lahad E, Wijsman EM, Nemens E, *et al.* A familial Alzheimer's disease locus on chromosome 1. *Science* 1995; 269:970-973
63. Xu W, Fang F, Ding J, Wu C. Dysregulation of Rab5-mediated endocytic pathways in Alzheimer's disease. *Traffic* 2018; 19:253-262.
64. Reitz C, Tokuhira S, Clark LN, *et al.* SORCS1 alters amyloid precursor protein processing and variants may increase Alzheimer's disease risk. *Ann Neurol* 2011; 69:47-64.
65. Reitz C, Tosto G, Vardarajan B, *et al.* Independent and epistatic effects of variants in VPS10-d receptors on Alzheimer disease risk and processing of the amyloid precursor protein (APP). *Transl Psychiatry* 2013; 3:e256.
66. Rogaeve E, Meng Y, Lee JH, *et al.* The neuronal sortilin-related receptor SORL1 is genetically associated with Alzheimer's disease. *Nat Genet* 2007; 39:168-177.
67. Kovacs GG, Murrell JR, Horvath S, *et al.* TARDBP variation associated with frontotemporal dementia, supranuclear gaze palsy, and chorea. *Mov Disord* 2009; 24:1843-1847.
68. Jakobsdottir J, van der Lee SJ, Bis JC, *et al.* Rare functional variant in TM2D3 is associated with late-onset Alzheimer's disease. *PLoS Genet* 2016; 12:e1006456.
69. Jonsson T, Stefansson H, Steinberg S, *et al.* Variant of TREM2 associated with the risk of Alzheimer's disease. *N Engl J Med* 2013; 368:107-116.
70. Guerreiro R, Wojtas A, Bras J, *et al.* TREM2 variants in Alzheimer's disease. *N Engl J Med* 2013; 368:117-127.
71. Ruiz A, Heilmann S, Becker T, *et al.* Follow-up of loci from the International Genomics of Alzheimer's Disease Project identifies TRIP4 as a novel susceptibility gene. *Transl Psychiatry* 2014; 4:e358.
72. Wetzel-Smith MK, Hunkapiller J, Bhangale TR, *et al.* A rare mutation in UNC5C predisposes to late-onset Alzheimer's disease and increases neuronal cell death. *Nat Med* 2014; 20:1452-1457.
73. Mehta SG, Khare M, Ramani R, *et al.* Genotype-phenotype studies of VCP-associated inclusion body myopathy with Paget disease of bone and/or frontotemporal dementia. *Clin Genet* 2013; 83:422-431.
74. Kauwe JSK, Jacquart S, Chakraverty S, *et al.* Extreme cerebrospinal fluid amyloid beta levels identify family with late-onset Alzheimer's disease presenilin 1 mutation. *Ann Neurol* 2007; 61:446-453.
75. Fernández MV, Black K, Carrell D, *et al.* SORL1 variants across Alzheimer's disease European American cohorts. *Eur J Hum Genet* 2016; 24:1828-1830.
76. Guerreiro RJ, Baquero M, Blesa R, *et al.* Genetic screening of Alzheimer's disease genes in Iberian and African samples yields novel mutations in presenilins and APP. *Neurobiol Aging* 2010; 31:725-731.
77. Lindquist SG, Holm IE, Schwartz M, *et al.* Alzheimer disease-like clinical phenotype in a family with FTDP-17 caused by a MAPT R406W mutation. *Eur J Neurol* 2008; 15:377-385.
78. Vardarajan BN, Ghani M, Kahn A, *et al.* Rare coding mutations identified by sequencing of Alzheimer disease genome-wide association studies loci. *Ann Neurol* 2015; 78:487-498.
79. Price AL, Patterson NJ, Plenge RM, Weinblatt ME, Shadick NA, Reich D. Principal components analysis corrects for stratification in genome-wide association studies. *Nat Genet* 2006; 38:904-909.
80. Patterson N, Price AL, Reich D. Population structure and eigenanalysis. *PLoS Genet* 2006; 2, e190.
81. Szklarczyk D, Morris JH, Cook H, *et al.* The STRING database in 2017: quality-controlled protein-protein association networks, made broadly accessible. *Nucleic Acids Res* 2017; 45:D368.

**eTable 1.** Characteristics of Subjects in the ADSP WES Case-Control Dataset

| Group              | N      | Participants with AD | Controls    | Males       | Females     | Mean Age (SD) * | % APOE ε4 carrier |
|--------------------|--------|----------------------|-------------|-------------|-------------|-----------------|-------------------|
| European ancestry  | 10,441 | 5,617 (54%)          | 4,594 (44%) | 4,411 (42%) | 6,030 (58%) | 81.0 (9.1)      | 30%               |
| Caribbean Hispanic | 395    | 218 (55%)            | 177 (45%)   | 149 (38%)   | 246 (62%)   | 74.4 (7.8)      | 40%               |

\* Age at onset for AD cases, age at exam for controls

**eTable 2.** Previously Established Genes for AD, AD-Related Traits and Other Dementias

| Gene     | Disease or Trait | Reference  | Gene     | Disease or Trait | Reference |
|----------|------------------|------------|----------|------------------|-----------|
| ABCA7    | AD               | [10,13,14] | KCNMB2   | AD               | [15]      |
| ABCG1    | NP               | [15]       | LMNB1    | Leukodystrophy   | [49]      |
| ABI3     | AD               | [16]       | LMX1B    | HS               | [50]      |
| ACE      | AD               | [17]       | MAPT     | AD               | [48]      |
| ADAM10   | AD               | [18, 19]   | MEF2C    | AD               | [30]      |
| ADAMTS1  | AD               | [20]       | MS4A4A   | AD               | [11]      |
| ADI1     | NFT + CAA        | [21]       | MS4A6A   | AD               | [30]      |
| AKAP9    | AD               | [22]       | MTUS1    | HPV              | [51]      |
| APOE     | AD               | [23, 24]   | MVB12B   | AD               | [52]      |
| APP      | AD               | [25]       | NME8     | AD               | [30]      |
| BIN1     | AD               | [26]       | NOTCH3   | CADASIL          | [53, 54]  |
| BZRAP1   | AD               | [27]       | OSTN     | AD               | [40]      |
| C1QTNF4  | AD               | [28]       | PDGFRL   | HPV              | [51]      |
| CASP8    | AD               | [29]       | PFDN1    | AD               | [27]      |
| CASS4    | AD               | [30]       | PICALM   | AD               | [30]      |
| CD2AP    | AD               | [30]       | PILRA    | AD               | [55, 56]  |
| CD33     | AD               | [30]       | PLCG2    | AD               | [16]      |
| CELF1    | AD               | [30]       | PLD3     | AD               | [57]      |
| CHCHD10  | FTD              | [31]       | PLD4     | CSF Tau          | [51]      |
| CHMP2B   | FTD              | [32]       | PLXNA4   | AD               | [58]      |
| CLU      | AD               | [31]       | PPP2CB   | AD               | [59]      |
| COBL     | AD               | [33]       | PRNP     | CJD / GSS        | [60]      |
| CR1      | AD               | [30]       | PSEN1    | AD               | [61]      |
| CSF1R    | FTD              | [34]       | PSEN2    | AD               | [62]      |
| DSG2     | AD               | [30]       | PTK2B    | AD               | [30]      |
| ECHDC3   | AD               | [26]       | RIN3     | AD               | [63]      |
| ECRG4    | NP + NFT         | [21]       | SLC10A2  | AD               | [33]      |
| EIF2B1   | Leukodystrophy   | [35]       | SLC24A4  | AD               | [30]      |
| EIF2B2   | Leukodystrophy   | [36]       | SLC2A4A  | AD               | [51]      |
| EIF2B3   | Leukodystrophy   | [36]       | SORCS1   | AD               | [64, 65]  |
| EIF2B4   | Leukodystrophy   | [35]       | SORCS2   | AD               | [65]      |
| EIF2B5   | Leukodystrophy   | [36]       | SORCS3   | AD               | [65]      |
| EPHA1    | AD               | [10, 14]   | SORL1    | AD               | [66]      |
| FBXL7    | AD               | [37]       | SRRM4    | CSF Tau          | [51]      |
| FERMT2   | AD               | [30]       | TARDBP   | FTD              | [67]      |
| FRMD4A   | AD               | [38]       | TM2D3    | AD               | [68]      |
| FUS      | FTD              | [39]       | TP53INP1 | AD               | [44]      |
| GALNT7   | NP               | [15]       | TPBG     | AD               | [27]      |
| GLIS3    | AD               | [40]       | TRAPPC12 | NFT + CAA        | [21]      |
| GRN      | FTD              | [41, 42]   | TREM2    | AD               | [69, 70]  |
| HBEGF    | AD               | [27]       | TREML2   | AD               | [40]      |
| HDAC9    | NFT + CAA        | [21]       | TRIP4    | AD               | [71]      |
| HLA-DRB1 | AD               | [43]       | UNC5C    | AD               | [72]      |
| HLA-DRB5 | AD               | [30]       | USP6NL   | AD               | [27]      |
| IGHV1-67 | AD               | [44]       | VCP      | FTD              | [73]      |
| INPP5D   | AD               | [30]       | ZCWPW1   | AD               | [30, 56]  |
| ITM2B    | FBD /FDD         | [45-47]    | ZNF804B  | LMdT             | [51]      |
| KANSL1   | AD               | [48]       |          |                  |           |



AD = Alzheimer disease; CAA = cerebral amyloid angiopathy; CADASIL = Cerebral Autosomal Dominant Arteriopathy with Subcortical Infarcts and Leukoencephalopathy; CJD = Creutzfeldt-Jakob disease; FBD = Familial British dementia; FDD = Familial Danish dementia; FTD = fronto-temporal dementia; GSS = Gerstmann-Straussler syndrome; HPV = hippocampal volume; HS = hippocampal sclerosis; LMdT = logical memory – delayed recall; NFT = neurofibrillary tangle; NP = neuritic plaque

**eTable 3.** Filtering Pipeline of Rare Variants

| <b># of Variants<br/>(# of Genes)</b> | <b>Filtering Steps</b>                                                                                                                                                                                                            |
|---------------------------------------|-----------------------------------------------------------------------------------------------------------------------------------------------------------------------------------------------------------------------------------|
| 1,015,329<br>(29,157)                 | Total rare variants genome-wide after counts are calculated with PLINK                                                                                                                                                            |
| 75,716<br>(15,702)                    | Total rare variants genome-wide after filtering (to remove synonymous mutations, those with a count less than or equal to 2) and restricted to those with a high or moderate impact on disease (as classified by VEP annotation). |
| 4,854 (3,619)                         | Total rare variants genome-wide after filtering and with high impact on disease.                                                                                                                                                  |
| 10,249 (95)                           | Total rare variants in known AD genes                                                                                                                                                                                             |
| 503 (83)                              | Total rare variants in known AD genes after filtering and with high and moderate impact on disease.                                                                                                                               |
| 24 (19)                               | Total rare variants in known AD genes after filtering and with high impact on disease.                                                                                                                                            |

**eTable 4.** High and Moderate Impact Rare Variants in Previously Established AD Genes Occurring In  $\geq 4$  Participants With AD and No Controls.

| (Chromosome: position: major allele: minor allele) * | MAC | Gene          | ID          | Frequency in GnomAD | Mutation Type      | Amino Acid Position and Change | Disease Impact | CADD Score | Previously Associated with AD |
|------------------------------------------------------|-----|---------------|-------------|---------------------|--------------------|--------------------------------|----------------|------------|-------------------------------|
| 19:15302421:C:T                                      | 10  | <i>NOTCH3</i> | rs149307620 | T=0.00031           | Missense           | A284T                          | Moderate       | 24.7       | No                            |
| 14:73637653:C:T                                      | 7   | <i>PSEN1</i>  | rs63749824  | T=0.00001           | Missense           | A75V                           | Moderate       | 27.1       | [74]                          |
| 9:4118361:G:C                                        | 6   | <i>GLIS3</i>  | rs200263979 | C=0.00104           | Missense           | L373V                          | Moderate       | 15.67      | No                            |
| 14:93154397:G:A                                      | 6   | <i>RIN3</i>   | Novel       | NA                  | Missense           | NA                             | Moderate       | 18.65      | No                            |
| 17:44143925:C:T                                      | 6   | <i>KANSL1</i> | rs138698439 | T=0.00046           | Missense           | S609N                          | Moderate       | 20.2       | No                            |
| 11:121384991:A:G                                     | 5   | <i>SORL1</i>  | rs139710266 | G=0.00003           | Missense           | Y391C                          | Moderate       | 25.8       | [75]                          |
| 14:73640432:G:A                                      | 5   | <i>PSEN1</i>  | rs375376095 | A=0.00007           | Missense           | NA                             | Moderate       | 10.23      | No                            |
| 16:31193959:ATTC:A                                   | 5   | <i>FUS</i>    | Novel       | NA                  | In-frame deletion  | NA                             | Moderate       | 13.39      | No                            |
| 17:56385997:G:A                                      | 5   | <i>BZRAP1</i> | rs61732758  | A=0.00374           | Missense           | P1546S                         | Moderate       | 16.91      | No                            |
| 19:1054190:A:G                                       | 5   | <i>ABCA7</i>  | rs376824416 | G=0.00010           | Splice acceptor    | NA                             | High           | 23.1       | No                            |
| 2:234113197:C:T                                      | 4   | <i>INPP5D</i> | rs532718867 | T=0.00036           | Missense           | P1133L                         | Moderate       | 0.44       | No                            |
| 4:7731386:G:A                                        | 4   | <i>SORCS2</i> | rs371407070 | A=0.00011           | Missense           | V1019L                         | Moderate       | 24         | No                            |
| 6:41129295:G:A                                       | 4   | <i>TREM2</i>  | rs104894002 | A=0.00002           | Stop Gained        | Q33X                           | High           | 33         | [70]                          |
| 7:143088779:C:T                                      | 4   | <i>EPHA1</i>  | rs201365734 | G=0.01583           | Missense           | A712P                          | Moderate       | 5.88       | No                            |
| 7:51096830:C:G                                       | 4   | <i>COBL</i>   | rs112568753 | T=0.00025           | Missense           | R929H                          | Moderate       | 25.1       | No                            |
| 8:17478643:A:G                                       | 4   | <i>PDGFRL</i> | rs144384825 | G=0.00019           | Missense           | Q146R                          | Moderate       | 18.08      | No                            |
| 9:4118324:C:A                                        | 4   | <i>GLIS3</i>  | rs200959196 | A=0.00021           | Missense           | G385V                          | Moderate       | 9.21       | No                            |
| 11:59949160:A:G                                      | 4   | <i>MS4A6A</i> | Novel       | NA                  | Missense           | NA                             | Moderate       | 21.1       | No                            |
| 14:105396368:T:G                                     | 4   | <i>PLD4</i>   | Novel       | A=0.00018           | Missense           | R35Q                           | Moderate       | 16.45      | No                            |
| 14:73637521:G:A                                      | 4   | <i>PSEN1</i>  | rs63750592  | NA                  | Missense           | R35Q                           | Moderate       | 22.1       | [76]                          |
| 14:93154353:T:TGTGCGCGCA                             | 4   | <i>RIN3</i>   | Novel       | NA                  | In-frame insertion | NA                             | Moderate       | 23.2       | No                            |
| 15:102192524:A:G                                     | 4   | <i>TM2D3</i>  | rs201415552 | G=0.00005           | Missense           | L14S                           | Moderate       | 8.86       | No                            |
| 16:81972496:A:G                                      | 4   | <i>PLCG2</i>  | Novel       | NA                  | Missense           | NA                             | Moderate       | 22.6       | No                            |
| 17:42429772:C:T                                      | 4   | <i>GRN</i>    | Novel       | NA                  | Stop Gained        | NA                             | High           | 36         | No                            |
| 17:44101427:C:T                                      | 4   | <i>MAPT</i>   | rs63750424  | T=0.00002           | Missense           | A741W                          | Moderate       | 29.8       | [77]                          |
| 17:61568688:G:A                                      | 4   | <i>ACE</i>    | rs143507892 | A=0.00113           | Missense           | R953Q                          | Moderate       | 29.5       | No                            |
| 17:61574683:C:T                                      | 4   | <i>ACE</i>    | Novel       | NA                  | Missense           | NA                             | Moderate       | 11.91      | No                            |
| 19:1043794:G:A                                       | 4   | <i>ABCA7</i>  | rs147846250 | A=0.00024           | Missense           | R334Q                          | Moderate       | 5.43       | No                            |
| 19:1055151:T:C                                       | 4   | <i>ABCA7</i>  | rs145987355 | NA                  | Missense           | NA                             | Moderate       | 26.5       | No                            |
| 19:1058154:G:T                                       | 4   | <i>ABCA7</i>  | rs770510230 | T=0.00001           | Stop Gained        | E1679X                         | High           | 39         | [78]                          |
| 19:1059029:G:A                                       | 4   | <i>ABCA7</i>  | rs143615723 | A=0.00015           | Missense           | R1803H                         | Moderate       | 0.73       | No                            |
| 19:15272218:G:A                                      | 4   | <i>NOTCH3</i> | rs114447350 | A=0.02775           | Missense           | P2074Q                         | Moderate       | 22.2       | No                            |

\* Position according to GRCh38.p7 assembly; MAC = minor allele count; CADD = Combined Annotation Dependent Depletion; NA = not available

**eTable 5.** Characteristics of AD Subjects in the ADSP WES Dataset With the *NOTCH3* rs149307620 Mutation

| Study (Dataset)                                       | Sex | Age at Onset | APOE Genotype | Braak Stage |
|-------------------------------------------------------|-----|--------------|---------------|-------------|
| ADGC (ADC2)                                           | F   | 71           | 33            | NA          |
| ADGC (ADC3)                                           | M   | 76           | 33            | 6           |
| ADGC (ADC3)                                           | M   | 78           | 34            | NA          |
| ADGC (ADC4)                                           | F   | 74           | 34            | NA          |
| ADGC (ADC5)                                           | M   | 78           | 24            | NA          |
| ADGC (Memory and Aging Project)                       | M   | 84           | 33            | NA          |
| ADGC (Texas Alzheimer's Research and Care Consortium) | F   | 80           | 33            | NA          |
| CHARGE                                                | M   | 79           | 33            | NA          |
| CHARGE                                                | M   | 95           | 33            | NA          |
| CHARGE                                                | F   | 84           | 33            | NA          |

NA = Not autopsied

**eTable 6.** Characteristics of Subjects in the WGS Replication Datasets

| <b>Dataset</b>                    | <b>N</b>     | <b>AD Cases</b> | <b>MCI Cases</b> | <b>Controls</b> | <b>% Female</b> | <b>Mean Age (SD)</b> | <b>% APOE ε4 carrier</b> |
|-----------------------------------|--------------|-----------------|------------------|-----------------|-----------------|----------------------|--------------------------|
| European ancestry ADSP Extension  | 1097         | 485             | 0                | 612             | 63.5%           | 78.4 (7.4)           | 38.5%                    |
| Caribbean Hispanic ADSP Extension | 1018         | 493             | 0                | 525             | 55.1%           | 73.9 (7.4)           | 29.4%                    |
| African American ADSP Extension   | 977          | 454             | 0                | 523             | 55.1%           | 79.2 (7.1)           | 43.3%                    |
| European ancestry ADSP families   | 499          | 320             | 0                | 179             | 64.5%           | 73.4 (10.6)          | 39.3%                    |
| Caribbean Hispanic ADSP families  | 290          | 200             | 0                | 90              | 62.8%           | 70.6 (10.1)          | 32.5%                    |
| African American ADSP families    | 44           | 30              | 0                | 14              | 65.3%           | 69.1 (12.1)          | 51.0%                    |
| ADNI                              | 809          | 239             | 321              | 249             | 44.8%           | 76.3 (8.1)           | 44.0%                    |
| <b>Total</b>                      | <b>4,734</b> | <b>2,221</b>    | <b>321</b>       | <b>2,192</b>    |                 |                      |                          |

**eTable 7.** Characteristics of AD Subjects With the *TREM2* rs104894002 Mutation (Q33X)

| <b>Source (Study)</b>                            | <b>Sex</b> | <b>Onset Age</b> | <b>APOE Genotype</b> | <b>Braak Stage</b> |
|--------------------------------------------------|------------|------------------|----------------------|--------------------|
| ADGC (ADC)                                       | M          | 75               | 23                   | 5                  |
| ADGC (Mayo Clinic)                               | M          | 63.3             | 44                   | NA                 |
| National Cell Repository for Alzheimer's Disease | F          | 69               | 34                   | 4                  |
| CHARGE (Rotterdam Study)                         | M          | 73.5             | 34                   | NA                 |

NA = not autopsied

**eTable 8.** High and Moderate Impact Rare Variants Genome-Wide Occurring in > 10 Participants With AD and No Controls.

| (Chromosome: position: major allele: minor allele) * | MAC | Gene            | ID          | Frequency in GnomAD | Mutation Type     | Amino Acid Position and Change | Disease Impact | CADD Score |
|------------------------------------------------------|-----|-----------------|-------------|---------------------|-------------------|--------------------------------|----------------|------------|
| 11:5474894:T:C                                       | 12  | <i>OR51I2</i>   | rs74049540  | C=0.01256           | Missense          | M59T                           | Moderate       | 24         |
| 19:38742032:G:A                                      | 12  | <i>PPP1R14A</i> | rs140507040 | A=0.00062           | Missense          | L97F                           | Moderate       | 16.24      |
| 14:45374714:CTTG:C                                   | 11  | <i>C14orf28</i> | Novel       | NA                  | In-frame deletion | NA                             | Moderate       | 20.1       |
| 17:42433931:C:G                                      | 11  | <i>FAM171A2</i> | rs190723348 | A=0.00023           | Missense          | L88                            | Moderate       | 19.26      |
| 17:7164266:G:A                                       | 11  | <i>CLDN7</i>    | rs149308129 | G=0.00056           | Missense          | Q155H                          | Moderate       | 23.4       |
| 20:62198583:G:A                                      | 11  | <i>HELZ2</i>    | rs35691275  | A=0.00053           | Missense          | R141W                          | Moderate       | 16.17      |
| 22:46759981:G:C                                      | 11  | <i>CELSR1</i>   | rs61741871  | C=0.00766           | Missense          | P2983A                         | Moderate       | 3.6        |
| 22:46762988:C:T                                      | 11  | <i>CELSR1</i>   | rs75983687  | T=0.00741           | Missense          | V2703M                         | Moderate       | 17         |
| 1:93682193:A:T                                       | 10  | <i>CCDC18</i>   | rs191574433 | T=0.00034           | Missense          | M573L                          | Moderate       | 17.01      |
| 7:150389837:TC:T                                     | 10  | <i>GIMAP2</i>   | Novel       | NA                  | Frameshift        | NA                             | High           | 22.8       |
| 9:33941796:C:T                                       | 10  | <i>UBAP2</i>    | rs150194348 | T=0.00078           | Missense          | V594I                          | Moderate       | 21.2       |
| 11:67957408:C:T                                      | 10  | <i>SUV420H1</i> | rs138431226 | T=0.00036           | Missense          | A46T                           | Moderate       | 15.32      |
| 12:88456506:T:C                                      | 10  | <i>CEP290</i>   | Novel       | NA                  | Missense          | NA                             | Moderate       | 25.3       |
| 14:31119819:C:A                                      | 10  | <i>SCFD1</i>    | rs35187633  | A=0.00029           | Missense          | L173I                          | Moderate       | 27.2       |
| 17:74288944:A:G                                      | 10  | <i>QRICH2</i>   | Novel       | A=0.01587           | Missense          | G248=                          | Moderate       | 15.81      |
| 14:74754936:G:A                                      | 10  | <i>ABCD4</i>    | rs57773157  | T=0.01605           | Missense          | V172I                          | Moderate       | 4.738      |
| 14:74763064:C:T                                      | 10  | <i>ABCD4</i>    | rs34992370  | C=0.01630           | Missense          | Q59R                           | Moderate       | 15.35      |
| 14:74766360:T:C                                      | 10  | <i>ABCD4</i>    | rs58272575  | C=0.00217           | Missense          | D1330E                         | Moderate       | 15.68      |
| 17:58260659:A:C                                      | 10  | <i>USP32</i>    | rs201933998 | NA                  | Missense          | NA                             | Moderate       | 12.92      |
| 19:15302421:C:T                                      | 10  | <i>NOTCH3</i>   | rs149307620 | T=0.00031           | Missense          | A284T                          | Moderate       | 24.7       |
| 19:49123796:G:A                                      | 10  | <i>SPHK2</i>    | Rs158184205 | NA                  | Missense          | NA                             | Moderate       | 16.44      |
| 22:41605776:G:C                                      | 10  | <i>L3MBTL2</i>  | rs143455680 | C=0.01316           | Missense          | R34P                           | Moderate       | 27.4       |
| 22:46704734:C:T                                      | 10  | <i>GTSE1</i>    | rs34404175  | T=0.00608           | Missense          | A219V                          | Moderate       | 5.9        |
| 22:46708152:G:A                                      | 10  | <i>GTSE1</i>    | rs35503220  | A=0.00609           | Missense          | A293S                          | Moderate       | 0.001      |

\*Position according to GRCh38.p7 assembly; MAC = minor allele count; CADD = Combined Annotation Dependent Depletion

**eTable 9.** Genes With  $\geq 3$  Distinct High/Moderate Disease Impact Rare Variants Each With a MAC  $\geq 5$  and Occurring in Only Cases

| (Chromosome: position: major allele: minor allele) * | MAC | Gene   | ID          | Frequency in GnomAD | Mutation Type   | Amino Acid Position and Change | Disease Impact | CADD Score |
|------------------------------------------------------|-----|--------|-------------|---------------------|-----------------|--------------------------------|----------------|------------|
| 14:74754936:G:A                                      | 10  | ABCD4  | rs57773157  | A=0.01587           | Missense        | G248=                          | Moderate       | 15.81      |
| 14:74766360:T:C                                      | 10  | ABCD4  | rs58272575  | C=0.01630           | Missense        | Q59R                           | Moderate       | 4.738      |
| 14:74763064:C:T                                      | 10  | ABCD4  | rs34992370  | T=0.01605           | Missense        | Va72I                          | Moderate       | 15.35      |
| 14:74764675:G:A                                      | 8   | ABCD4  | rs61744947  | A=0.01600           | Missense        | A128V                          | Moderate       | 22.2       |
| 3:38125659:C:T                                       | 6   | DLEC1  | rs143610524 | T=0.00078           | Missense        | A395V                          | Moderate       | 16.39      |
| 3:38101245:C:T                                       | 6   | DLEC1  | rs34012183  | T=0.00326           | Missense        | S192F                          | Moderate       | 15.95      |
| 3:38101313:G:A                                       | 5   | DLEC1  | rs149190717 | A=0.00100           | Missense        | D215N                          | Moderate       | 15.76      |
| 1:225239279:G:A                                      | 6   | DNAH14 | Novel       | NA                  | Missense        | NA                             | Moderate       | 12.93      |
| 1:225512438:G:A                                      | 5   | DNAH14 | rs566891789 | A=0.00009           | Splice Acceptor | NA                             | High           | 32         |
| 1:225458497:C:T                                      | 5   | DNAH14 | rs530417418 | NA                  | Missense        | NA                             | Moderate       | 28.1       |
| 7:111430638:G:A                                      | 5   | DOCK4  | rs377187510 | A=0.00007           | Missense        | P1064S                         | Moderate       | 27.9       |
| 7:111617307:G:A                                      | 5   | DOCK4  | rs201242965 | A=0.00016           | Missense        | P194L                          | Moderate       | 20.8       |
| 7:111503433:T:C                                      | 5   | DOCK4  | Novel       | NA                  | Missense        | NA                             | Moderate       | 22.5       |
| 9:133932442:C:T                                      | 7   | LAMC3  | rs113443891 | T=0.00057           | Missense        | P689L                          | Moderate       | 19.73      |
| 9:133945155:G:A                                      | 7   | LAMC3  | rs113785045 | A=0.00032           | Missense        | R996H                          | Moderate       | 22.3       |
| 9:133936490:A:G                                      | 6   | LAMC3  | rs36030184  | G=0.00033           | Missense        | N743D                          | Moderate       | 17.38      |
| 9:133948124:G:A                                      | 5   | LAMC3  | rs144118534 | A=0.00027           | Missense        | G1107R                         | Moderate       | 0.34       |
| 14:64898328:A:G                                      | 6   | MTHFD1 | rs139264994 | G=0.00012           | Missense        | I464V                          | Moderate       | 18.17      |
| 14:64884726:C:T                                      | 6   | MTHFD1 | rs199501976 | T=0.00024           | Missense        | A200V                          | Moderate       | 22.5       |
| 14:64916188:C:T                                      | 6   | MTHFD1 | rs17857382  | T=0.00727           | Missense        | L769F                          | Moderate       | 20.5       |
| 1:228526693:C:T                                      | 5   | OBSCN  | rs370778898 | T=0.00012           | Missense        | R5742C                         | Moderate       | 2.48       |
| 1:228558959:G:A                                      | 5   | OBSCN  | rs191931829 | A=0.00026           | Missense        | R7784Q                         | Moderate       | 24.9       |
| 1:228437675:C:T                                      | 5   | OBSCN  | rs199655077 | T=0.00016           | Missense        | A1348V                         | Moderate       | 25         |
| 14:88904567:G:A                                      | 6   | SPATA7 | rs10139784  | A=0.01203           | Missense        | R534L                          | Moderate       | 9.96       |
| 14:88892697:G:A                                      | 6   | SPATA7 | rs17124662  | A=0.00905           | Missense        | S165I                          | Moderate       | 0.74       |
| 14:88883100:A:G                                      | 6   | SPATA7 | rs61747004  | G=0.00906           | Missense        | Q63R                           | Moderate       | 1.02       |
| 14:88895750:G:A                                      | 6   | SPATA7 | rs17124677  | A=0.00905           | Missense        | G292E                          | Moderate       | 12.42      |
| 14:88883173:T:G                                      | 5   | SPATA7 | rs35137272  | G=0.00908           | Missense        | F87L                           | Moderate       | 3.02       |
| 1:1269488:G:A                                        | 6   | TAS1R3 | rs112507608 | A=0.01353           | Missense        | A735T                          | Moderate       | 10.39      |
| 1:1268954:C:T                                        | 5   | TAS1R3 | rs200679891 | T=0.00018           | Missense        | R557C                          | Moderate       | 14.79      |



|                 |   |        |             |           |          |         |          |      |
|-----------------|---|--------|-------------|-----------|----------|---------|----------|------|
| 1:1268661:G:A   | 5 | TAS1R3 | rs373494410 | A=0.00015 | Missense | R501Q   | Moderate | 23.4 |
| 2:179499179:A:G | 9 | TTN    | rs34706299  | G=0.00033 | Missense | V5045A  | Moderate | 23.4 |
| 2:179412829:C:T | 6 | TTN    | rs72648251  | T=0.00047 | Missense | R28607H | Moderate | 20.3 |
| 2:179452061:C:T | 5 | TTN    | rs199505416 | T=0.00008 | Missense | D18725N | Moderate | 23   |
| 2:179457733:G:A | 5 | TTN    | rs72646839  | A=0.00024 | Missense | R10640C | Moderate | 24.4 |
| 2:179440609:A:G | 5 | TTN    | rs201836227 | G=0.00022 | Missense | I20849T | Moderate | 24.5 |
| 2:179613715:C:G | 5 | TTN    | rs145919543 | G=0.00011 | Missense | G4471A  | Moderate | 9.30 |

\* Position according to GRCh38.p7 assembly; MAC = minor allele count; CADD = Combined Annotation Dependent Depletion; NA = not available

**eTable 10.** High Impact Rare Variants Genome-Wide With a MAC  $\geq 7$  and Occurring Only in AD Cases.

| (Chromosome: position: major allele: minor allele) * | MAC | Gene    | ID          | Frequency in GnomAD | Mutation Type           | Amino Acid Position and Change | Disease Impact | CADD Score |
|------------------------------------------------------|-----|---------|-------------|---------------------|-------------------------|--------------------------------|----------------|------------|
| 7:150389837:TC:T                                     | 10  | GIMAP2  | Novel       | NA                  | Frameshift              | NA                             | High           | 5.92       |
| 19:39926486:A:G                                      | 8   | RPS16   | rs139109626 | G=0.00021           | Splice donor            | NA                             | High           | 22.4       |
| 11:5758174:CAATT:C                                   | 8   | OR56B1  | Novel       | NA                  | Frameshift              | NA                             | High           | 14.8       |
| 10:16979600:TGGTA:T                                  | 7   | CUBN    | rs556462218 | NA                  | Frameshift              | I1973V                         | High           | 40.0       |
| 10:25313667:T:A                                      | 7   | THNSL1  | rs150653385 | A=0.00015           | Stop gained             | C505X                          | High           | 37.0       |
| 1:63063592:GAAGTC:G                                  | 7   | ANGPTL3 | Novel       | NA                  | Frameshift              | NA                             | High           | 21.0       |
| 17:72350672:C:T                                      | 7   | KIF19   | rs200837156 | T=0.00021           | Stop gained             | R894X                          | High           | 20.6       |
| 1:21904139:TG:T                                      | 7   | ALPL    | Novel       | NA                  | Frameshift<br>stop lost | NA                             | High           | 12.9       |
| 2:111918994:A:G                                      | 7   | BCL2L11 | rs76245002  | G=0.00437           | Splice<br>acceptor      | NA                             | High           | 5.26       |

\* Position according to GRCh38.p7 assembly; MAC = minor allele count; CADD = Combined Annotation Dependent Depletion; NA = not available

**eFigure 1. Study Design**

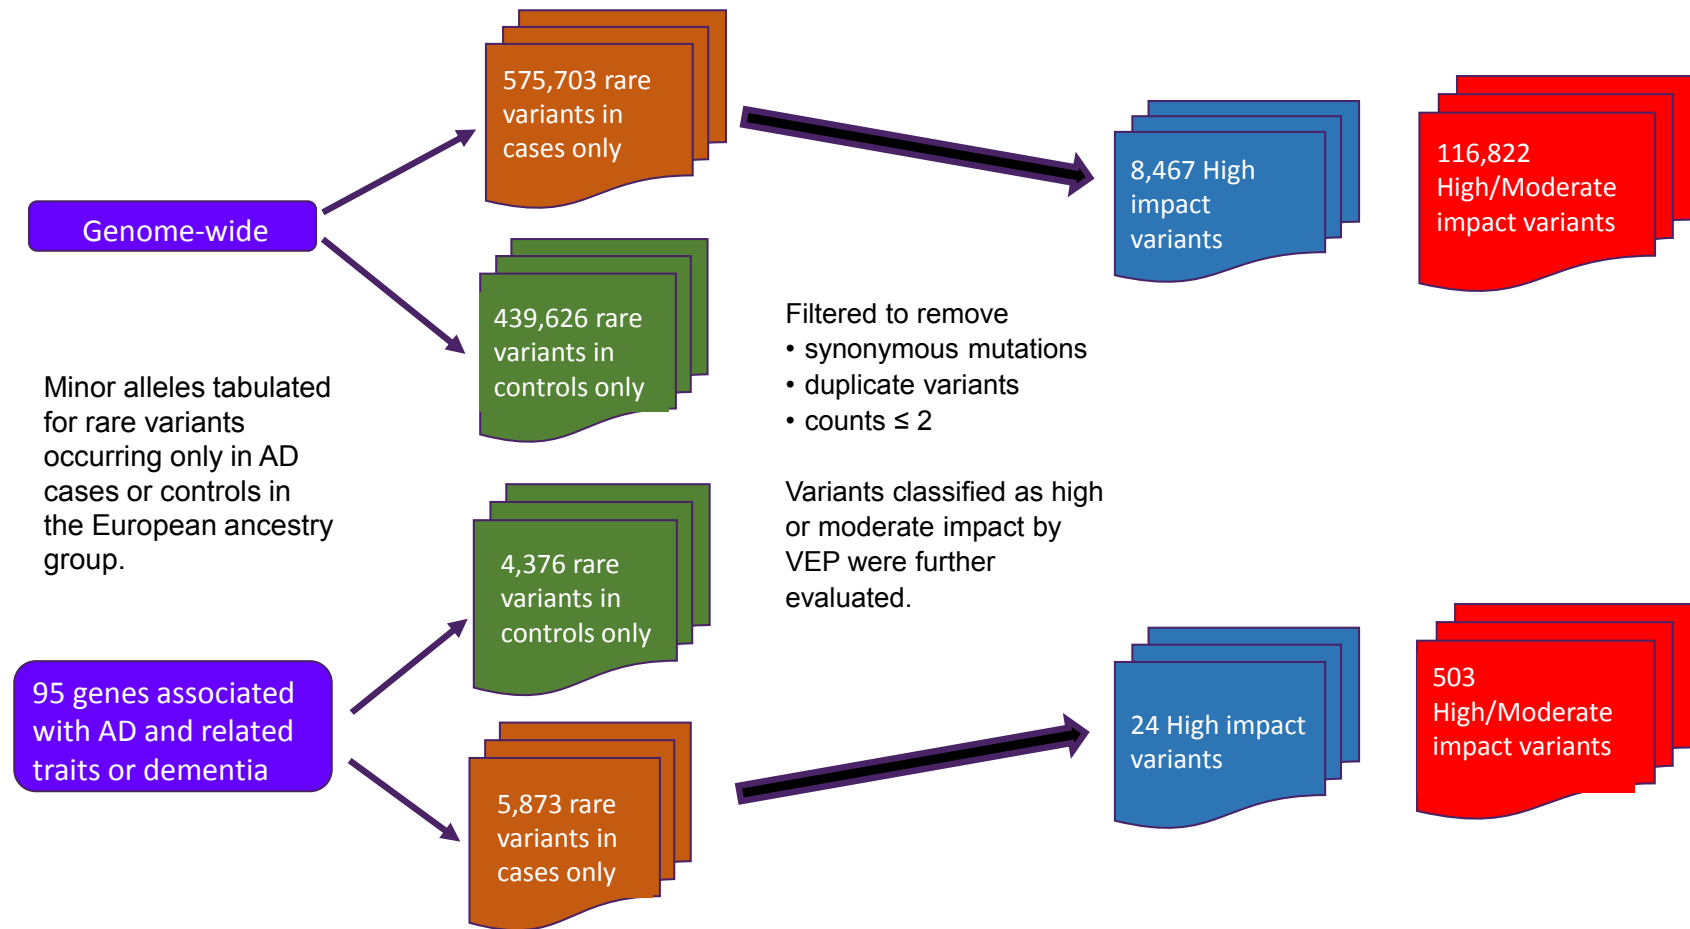

**eFigure 2.** Haplotype Analysis of the Rare *NOTCH3* rs149307620 Variant. All 10 subjects who have the rs149307620 mutation (marker 269) possess the GCCGC haplotype derived from five common SNPs (rs1548555, rs1044006, rs1043997, rs1043996, and rs1043994) spanning a region of ~24.8 kb. The haplotype has a frequency of 15.4% in AD cases and 14.7% in controls. Haplotypes and their corresponding frequencies are shown in the left panel. A measure of linkage disequilibrium ( $D'$ ) between each pair of SNPs is shown in the right panel.

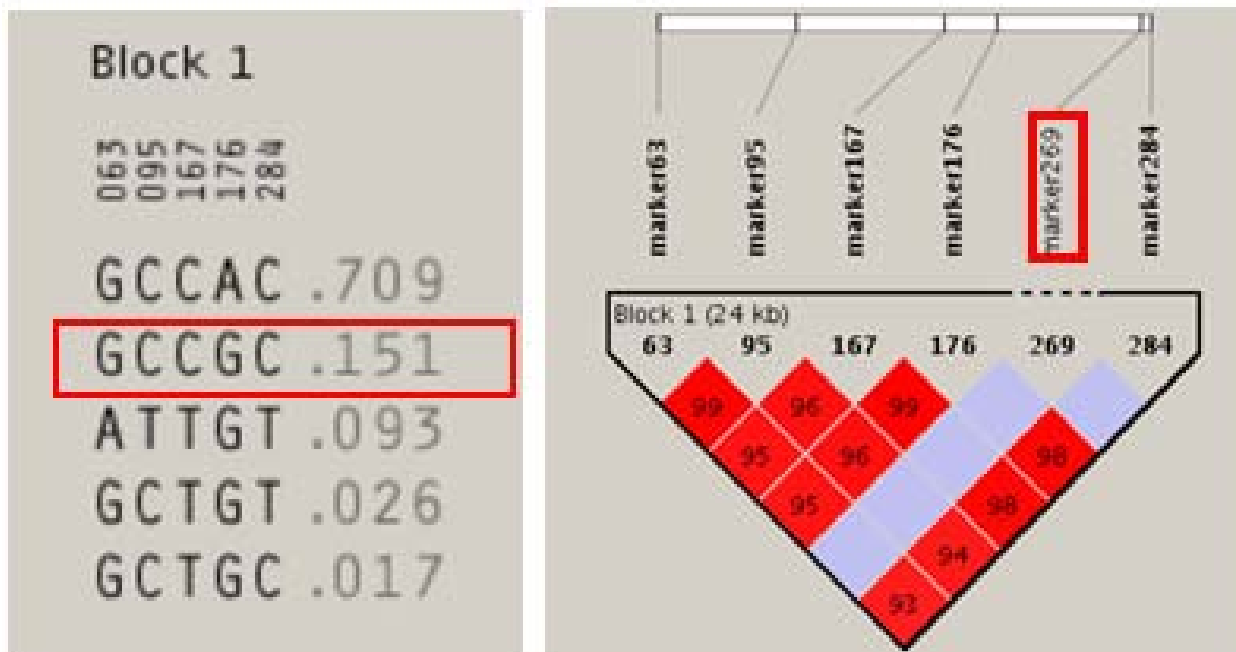

**eFigure 3. Population Substructure of the ADSP Discovery Sample.** Population substructure in the non-Hispanic European ancestry portion of the ADSP sample was evaluated by principal components (PC) analysis implemented in EIGENSTRAT<sup>79,80</sup> using the smartpca program as described previously.<sup>2</sup> For this analysis, variants were selected based on the following filtering criteria: MAF $\geq$ 5%, call rate $\geq$ 99%, and only one from each pair of variants with linkage disequilibrium (LD) of  $r^2 > 0.5$  in a 50-variant window. Participants with individual call rate < 90% were excluded, and only one participant from every pair with estimated  $\hat{\pi} > 0.2$  was selected. PCs were computed using the 1000 Genomes Phase 3 reference panel<sup>6</sup> and a subset of 12,351 variants that met the above criteria and were found in both ADSP and 1000G subjects. PCs were computed using all unrelated ADSP and 1000G subjects and projected on individuals that were omitted from the PC computation due to high IBD or low call rate. The plot of the first two PCs (PCA1 and PCA2) shows that participants (each represented by a small dot) are distributed along a population substructure gradient. A large portion of the persons in the cluster on the right side of the plot (PC1 > 0.025) have a mitochondrial haplogroup (K1a1b1a = light blue dots, K1a9 = dark blue dots) that is common among Ashkenazi Jews suggesting that this cluster includes primarily Ashkenazi Jews. Eight of the ten AD participants who have the *NOTCH3* rs149307620 mutation, including four persons with the K1a1b1a or K1a9 haplogroup (dark red + symbol) and four persons lacking either Ashkenazi haplogroup (brown + symbol), are included in this cluster.

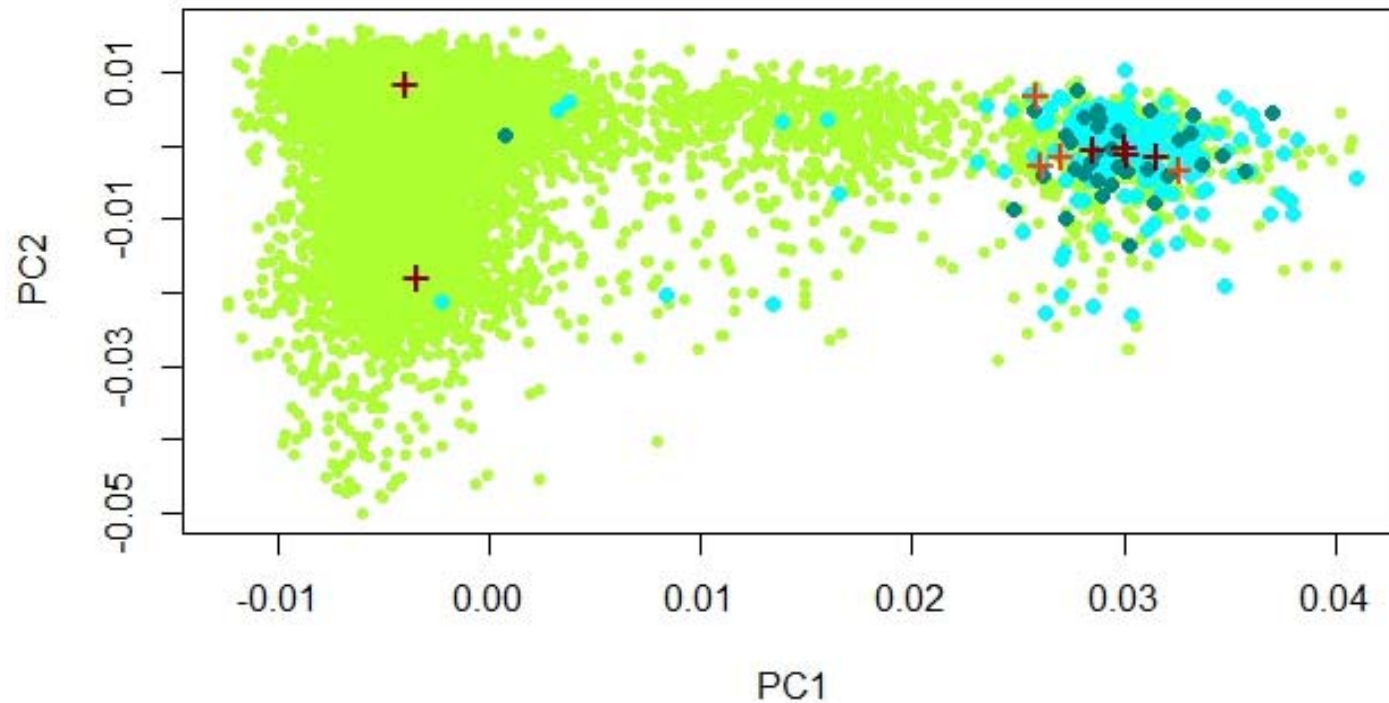

**eFigure 4.** Utah Pedigree Segregating rs141402160 and rs140914494 Mutations. Full shading indicates AD diagnosis from death certificate or hospital data; half shading indicates dementia diagnosis from death certificate or hospital data. For confidentiality purposes, alive/death status is not indicated and age shown is either + or – 5 years of the actual age or age at death or age >90. “+” indicates the presence of the minor allele at both rs141402160 and rs140914494, “-” indicates wild type at both variants, and “\*” indicates that carrier status was inferred as positive due to the rarity of the variants and their presence in that individual’s child (child not pictured in the pedigree due to lack of disease status information).

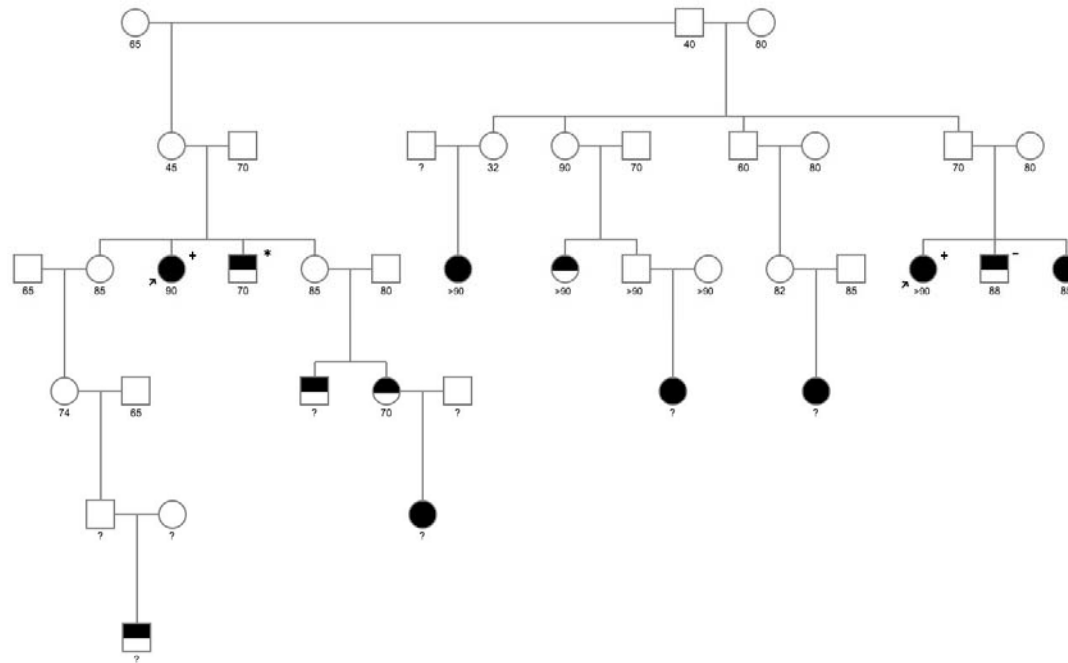

**eFigure 5.** Utah Pedigree Segregating rs112197217 Mutation. Full shading indicates AD diagnosis from death certificate or hospital data; half shading indicates dementia diagnosis from death certificate or hospital data. For confidentiality purposes, alive/death status is not indicated and age shown is either + or – 5 years of the actual age or age at death or age >90. “+” indicates that the individual is a carrier of the minor allele at rs112197217.

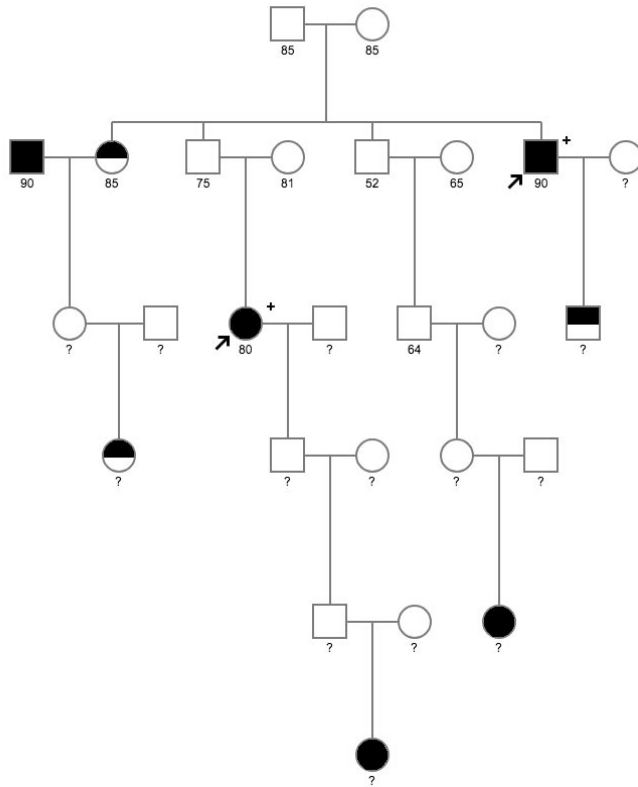

**eFigure 6. Protein-Protein Interaction Network Including *NOTCH3* and *JAG1*.**

Network includes 30 genes showing high-confidence interactions in humans according to the STRING database.<sup>81</sup> The colors of the edges refer to the type of evidence linking the corresponding proteins: red=gene fusion, dark blue=co-occurrence, black=co-expression, magenta=experiments, cyan=databases, light green=text mining, mauve=homology. Genes present in AD pathways determined by gene-set enrichment analysis (Table2) are highlighted by yellow circles.

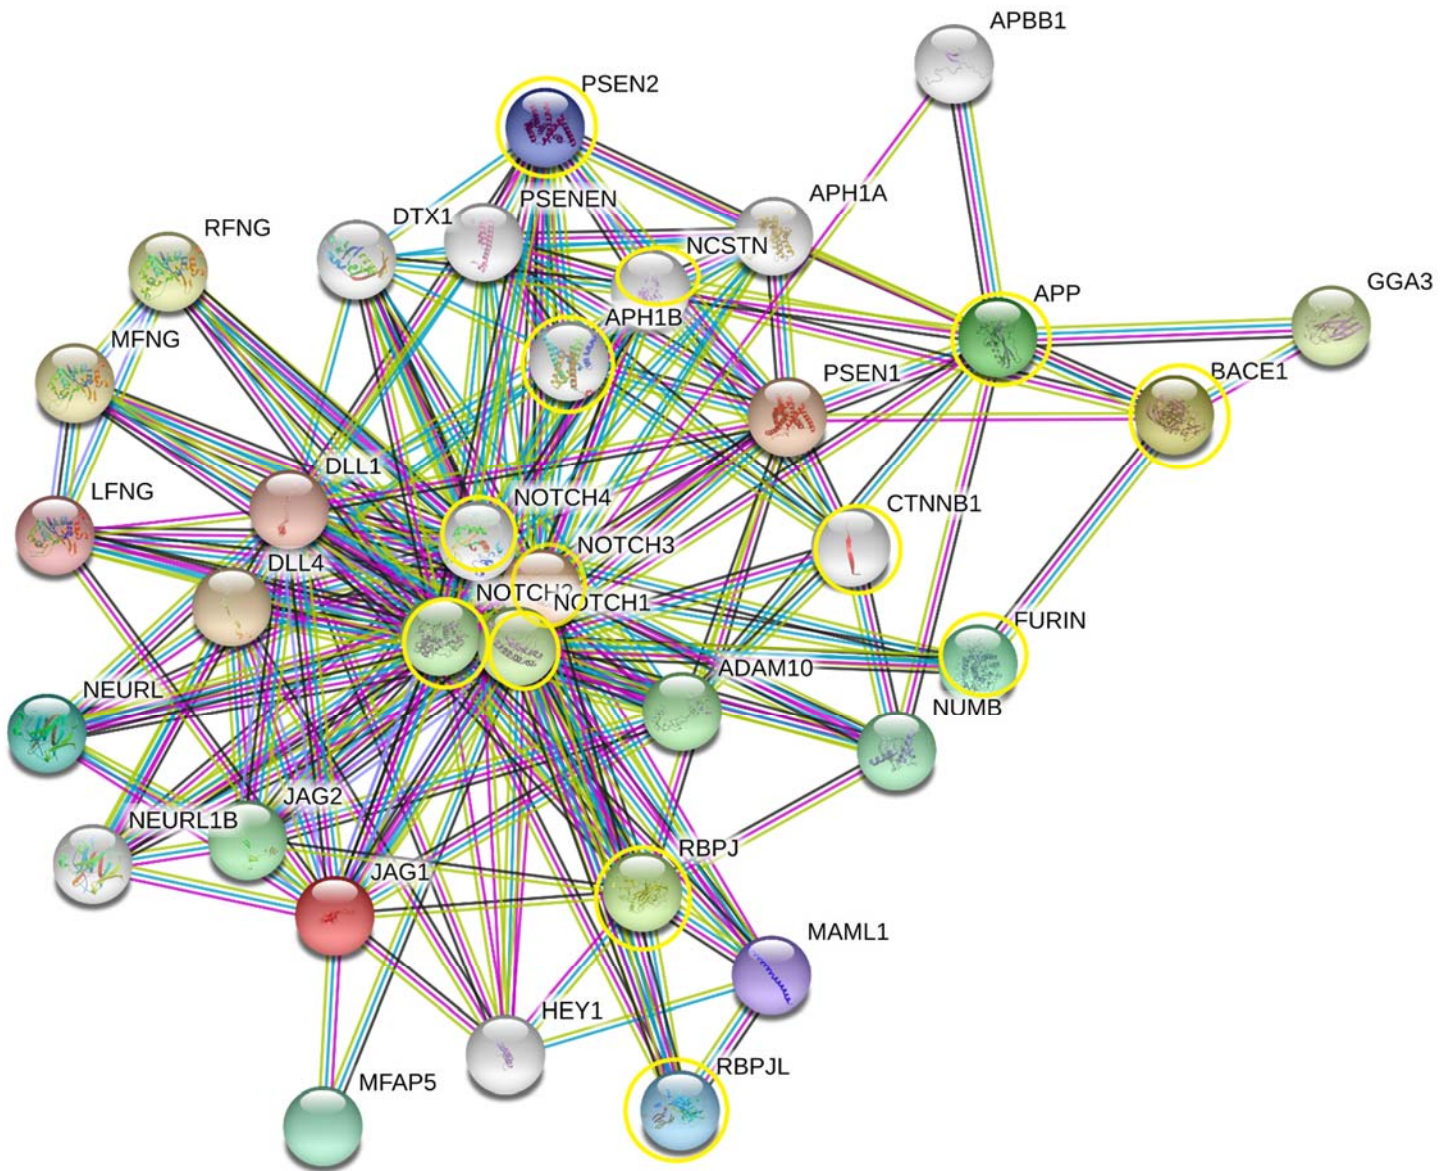





B.

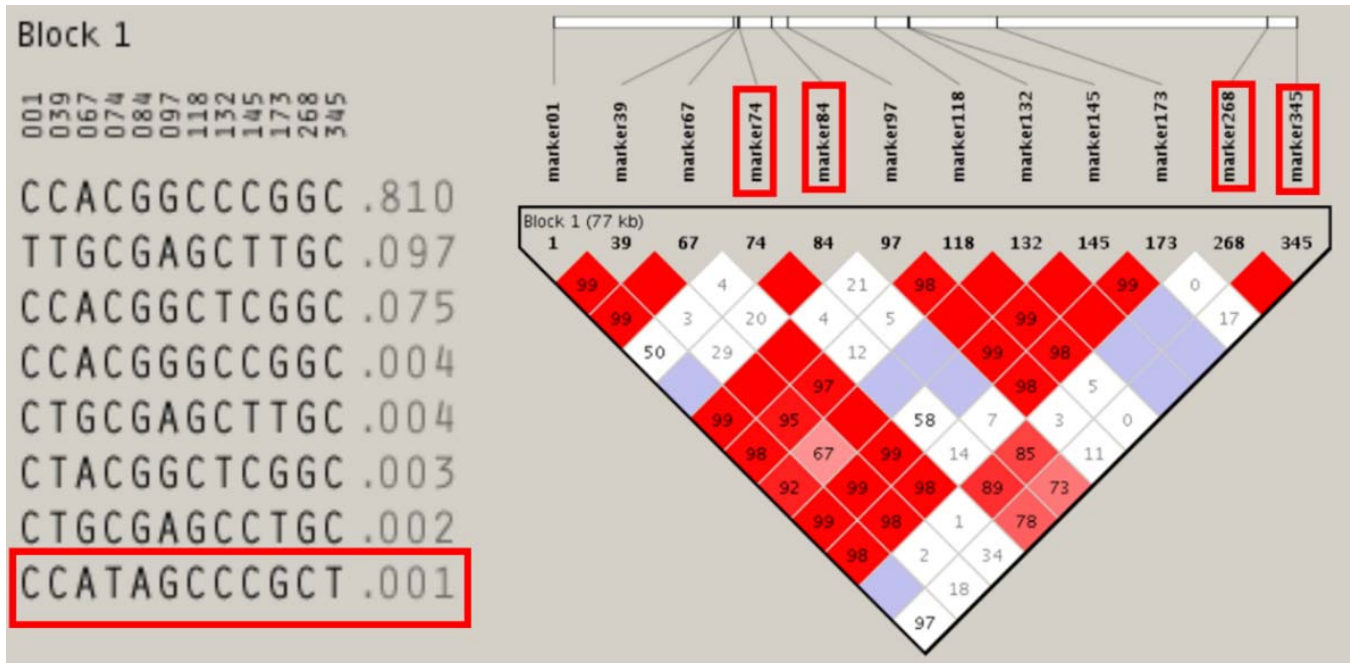

Supplement: jamanetwopen-2-e191350-s001.pdf [file jamanetwopen-2-e191350-s001.pdf]
